# Supplementary material for: Cyanidin-3-O-β-glucoside combined with its metabolite protocatechuic acid attenuated the activation of mice hepatic stellate cells
Source: Royal Society of Chemistry journal article supplement (doi:10.1039/c7fo00265c), 2017-01-01
Supplement: c7fo00265c1.pdf [file c7fo00265c1.pdf]

**Cyanidin-3-o- $\beta$ -glucoside combined with its  
metabolite protocatechuic acid attenuated the activation of mice  
hepatic stellate cells**

**Electronic Supplementary Information**

Xinwei Jiang,<sup>a,b</sup> Tianran Shen,<sup>b</sup> Xilan Tang,<sup>b</sup> Wenqi Yang,<sup>b</sup> Honghui Guo,<sup>\*c</sup> and  
Wenhua Ling<sup>\*b,d</sup>

<sup>a</sup>Department of Food Science and Engineering, Institute of Science and Technology,  
Jinan University, Guangzhou 510632, People's Republic of China

<sup>b</sup>Department of Nutrition, School of Public Health, Sun Yat-Sen University,  
Guangzhou 510080, People's Republic of China

<sup>c</sup>Department of Nutrition, Henry Fok School of Food Science and Engineering,  
Shaoguan University, Shaoguan 512005, People's Republic of China

<sup>d</sup>Guangdong Provincial Key Laboratory of Food, Nutrition and Health, Guangzhou  
510080, People's Republic of China

\*Corresponding authors:

\*Honghui Guo, Phone: 86-751-8120167. Fax: 86-751-8121429.

E-mail: guohh1999@hotmail.com.

\*Wenhua Ling, Phone: 86-20-87331597. Fax: 86-20-87330446.

E-mail: lingwh@mail.sysu.edu.cn

## Supplementary Materials and Methods

**Measuring C3G and PCA by HPLC-PAD.** The standard substance of C3G was kindly provided by Biosynth AS (Sandnes, Norway), standard PCA was purchased from Sigma-aldrich (St. Louis, MO, USA). Treated samples of serum and liver tissue were loaded to Agilent Zorbax SB-C<sup>18</sup> column (2.1 mm × 50 mm, 1.8 μm) at a volume of 50 μL. The mobile phase was composed of eluent A (0.3% formic acid in water, v/v) and eluent B (methanol), the gradient elution program was performed as following supplemental table 1 (Table S1). Column temperature was 30°C, photodiode array detector determine wavelength was 520 nm for C3G and 260 for PCA. The standard curve were shown in Table S2 and S3.

**Table S1.** The gradient elution program of HPLC.

|   | Time (min) | Flow rate (mL/min) | %A  | %B |
|---|------------|--------------------|-----|----|
| 1 | 0.01       | 1                  | 15  | 85 |
| 2 | 1          | 1                  | 20  | 80 |
| 3 | 3          | 1                  | 40  | 60 |
| 4 | 6          | 1                  | 60  | 40 |
| 5 | 10         | 1                  | 65  | 35 |
| 6 | 12         | 1                  | 75  | 25 |
| 7 | 18         | 1                  | 100 | 0  |
| 8 | 22         | 1                  | 15  | 85 |
| 9 | 23         | 0.2                | 15  | 85 |

**Table S2.** The standard curve of C3G.

| Standard C3G (ng/μL) | Retention time (min) | Peak area |
|----------------------|----------------------|-----------|
| 31.25                | 10.158               | 1086424   |
| 15.625               | 11.417               | 529078    |
| 7.813                | 10.004               | 303378    |
| 3.906                | 10.183               | 95285     |
| 1.953                | 10.145               | 56348     |
| 0.977                | 10.524               | 21814     |
| 0.488                | -                    | -         |
| 0                    | -                    | -         |

**Table S3.** The standard curve of PCA.

| Standard PCA (ng/ $\mu$ L) | Retention time (min) | Peak area |
|----------------------------|----------------------|-----------|
| 31.25                      | 6.072                | 5500431   |
| 15.625                     | 6.052                | 3040764   |
| 7.813                      | 6.033                | 1509202   |
| 3.906                      | 6.057                | 748310    |
| 1.953                      | 6.067                | 368711    |
| 0.977                      | 6.077                | 191576    |
| 0.488                      | 6.064                | 95215     |
| 0                          | -                    | -         |
